# Supplementary material for: Red Ginseng Improves Exercise Endurance by Promoting Mitochondrial Biogenesis and Myoblast Differentiation
Source: PubMed Central journal article supplement (PMC7070955; doi:10.3390/molecules25040865), 2020-02-16
Supplement: molecules-25-00865-s001.pdf [file molecules-25-00865-s001.pdf]

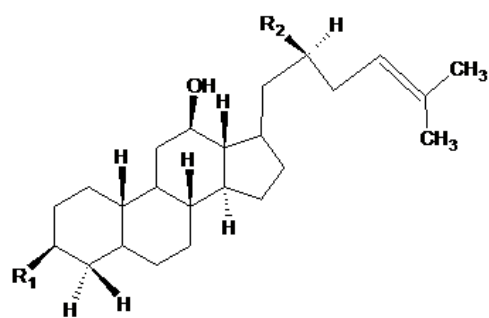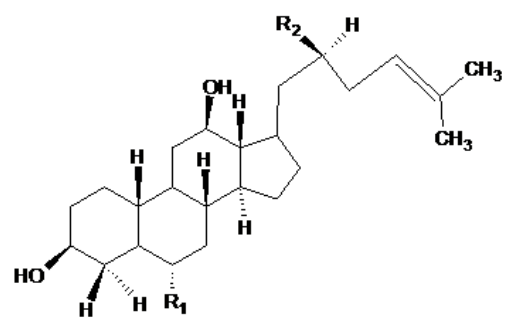

| Ginsenosides | R1          | R2             |
|--------------|-------------|----------------|
| Rb1          | Glc(2→1)Glc | Glc(6→1)Glc    |
| Rb2          | Glc(2→1)Glc | Glc(6→1)Ara(p) |
| Rb3          | Glc(2→1)Glc | Glc(2→1)Xyl    |
| Rc           | Glc(2→1)Glc | Glc(6→1)Ara(f) |
| Rd           | Glc(2→1)Glc | Glc            |
| Rg3          | Glc(2→1)Glc | H              |
| Rh2          | Glc         | H              |

| Ginsenosides | R1          | R2  |
|--------------|-------------|-----|
| Re           | Glc(2→1)Rha | Glc |
| Rg1          | Glc         | Glc |
| Rf           | Glc(2→1)Glc | H   |
| Rg2          | Glc(2→1)Glc | H   |
| Rh1          | Glc         | H   |

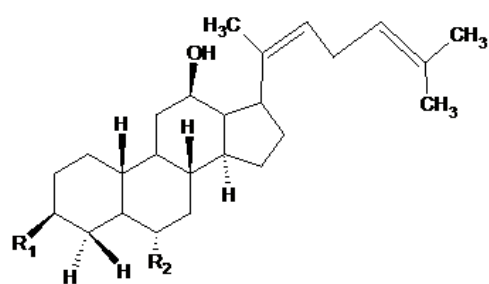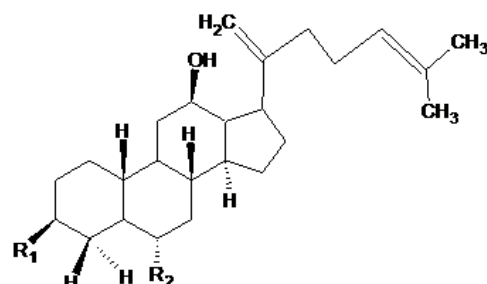

| Ginsenosides | R1          | R2  |
|--------------|-------------|-----|
| Rh4          | H           | Glc |
| Rg5          | Glc(2→1)Glc | H   |

| Ginsenosides | R1          | R2  |
|--------------|-------------|-----|
| Rk1          | Glc(2→1)Glc | H   |
| Rk3          | H           | Glc |

Supplementary Figure 1. Structure of ginsenosides.
